# Supplementary material for: Gradual Enhancement of the Assemblage Stability of the Reed Rhizosphere Microbiome with Recovery Time
Source: MDPI journal article supplement (doi:10.3390/microorganisms10050937), 2022-04-29
Supplement: s1 [file s1]

## Supplementary Materials

### Supplementary Methods

#### ***DNA extraction and PCR amplification***

Total DNA was extracted by the CTAB method as follows: A total of 1000  $\mu\text{L}$  of CTAB lysate was added to a 2.0 mL EP tube, lysozyme was added, and then an appropriate amount of sample was added to the lysate. The tube was placed in a 65°C water bath and inverted and mixed several times during the period to fully lyse the sample. The sample was centrifuged, and the supernatant was obtained. A 25:24:1 mixture of phenol (pH 8.0)/chloroform/isoamyl alcohol was added, and the solution was mixed well and centrifuged at 12000 rpm for 10 min. The supernatant was combined with a 24:1 chloroform/isoamyl alcohol solution, mixed well and centrifuged at 12000 rpm for 10 min. The supernatant was added to a 1.5 mL centrifuge tube, isopropanol was added and shaken well, and the mixture was left to settle at -20°C. The solution was centrifuged at 12000 rpm for 10 min, and the supernatant was carefully removed (being careful to not remove the precipitate). The precipitate was washed twice with 1.0 mL of 75% ethanol, and the remaining liquid was collected by centrifugation by pipette. The liquid was blow-dried on a clean bench or air-dried at room temperature (DNA samples were not completely dried). Distilled water was used to dissolve the DNA sample, with incubation at 55-60°C for 10 min. A total of 1  $\mu\text{L}$  of RNase A was added to dissolve the RNA, and the samples were placed at 37°C for 15 min. All PCRs were carried out in 30  $\mu\text{L}$  reactions with 15  $\mu\text{L}$  of Phusion® High-Fidelity PCR Master Mix (New England Biolabs, USA), 0.2  $\mu\text{M}$  forward and reverse primers, and approximately 10 ng of template DNA. Thermal cycling consisted of initial denaturation at 98°C for 1 min, followed by 30 cycles of denaturation at 98°C for 10 s, annealing at 50°C for 30 s, and elongation at 72°C for 30 s. The temperature was held at 72°C for 5 min. The same volume of 1  $\times$  loading buffer (containing SYBR green) was mixed with the PCR products, and electrophoresis was performed. Then, mixed PCR products were purified with a Gene JET™ Gel Extraction Kit (Thermo Scientific, Waltham) on 2% agarose gel for detection. PCR products were mixed in equal density ratios and stored at -80°C in a freezer for later use.

#### ***Data splitting and filtration***

Single-end reads were assigned to samples based on their unique barcode and were truncated by cutting off the barcode and primer sequence. Quality filtering of the raw reads was performed under specific filtering conditions to obtain high-quality clean reads according to the Cutadapt (Martin, 2011) (V1.9.1, <http://cutadapt.readthedocs.io/en/stable/>) quality control process. The reads were compared with the reference database (Silva database, <https://www.arb-silva.de/>) (Quast et al., 2013) using the UCHIME algorithm (UCHIME Algorithm, [http://www.drive5.com/usearch/manual/uchime\\_algo.html](http://www.drive5.com/usearch/manual/uchime_algo.html)) (Edgar et al., 2011) to detect chimera sequences, and then the chimera sequences were removed (Haas et al., 2011). The clean reads were finally obtained.

#### ***OTU cluster and species annotation***

Sequence analysis was performed by UPARSE software (UPARSE v7.0.1001, <http://drive5.com/uparse/>) (Edgar, 2013). Sequences with  $\geq 97\%$  similarity were assigned to the same OTU. Representative sequences for each OTU were screened for further annotation. For each representative sequence, the Silva database (<https://www.arb-silva.de/>) (Quast et al., 2013) was used based on the Mothur algorithm to annotate taxonomic information. To study the phylogenetic relationship of different OTUs and the difference in the dominant species in different samples (groups), multiple sequence alignment was conducted using MUSCLE software (Version 3.8.31, <http://www.drive5.com/muscle/>) (Edgar, 2004). OTU abundance information was normalized using a standard sequence number corresponding to the sample with the fewest sequences. Subsequent analyses of alpha diversity and beta diversity were performed based on these normalized data.

## Supplementary Data

**Table S1.** Latitudes and longitudes and basic information of the sample locations

| Sample ID | Recovery Time | Latitude and Longitude    | Physicochemical Parameters |                                              |                                          |                                         |                                         | Collect Time                                  |
|-----------|---------------|---------------------------|----------------------------|----------------------------------------------|------------------------------------------|-----------------------------------------|-----------------------------------------|-----------------------------------------------|
|           |               |                           | pH                         | Cond<br>( $\mu\text{S}\cdot\text{cm}^{-1}$ ) | TOC<br>( $\text{mg}\cdot\text{L}^{-1}$ ) | TN<br>( $\text{mg}\cdot\text{L}^{-1}$ ) | TP<br>( $\text{mg}\cdot\text{L}^{-1}$ ) |                                               |
| SH1       | 40-y          | 120.682926 E, 31.638804 N | 7.34                       | 289.03                                       | 8.62                                     | 0.72                                    | 0.73                                    | 11-13 April,<br>July and<br>November,<br>2020 |
| SH2       |               | 120.684299 E, 31.645573 N | 6.58                       | 326.33                                       | 13.72                                    | 0.96                                    | 0.52                                    |                                               |
| SH3       |               | 120.690120 E, 31.638832 N | 7.27                       | 289.58                                       | 6.84                                     | 0.55                                    | 0.56                                    |                                               |
| SJ1       | 30-y          | 120.798690 E, 31.555673 N | 6.60                       | 675.67                                       | 39.13                                    | 2.64                                    | 0.70                                    |                                               |
| SJ2       |               | 120.803035 E, 31.556443 N | 6.76                       | 440.26                                       | 16.99                                    | 1.25                                    | 0.54                                    |                                               |
| SJ3       |               | 120.803760 E, 31.551861 N | 6.69                       | 553.63                                       | 25.64                                    | 1.83                                    | 0.57                                    |                                               |
| TH1       | 20-y          | 120.354549 E, 31.322206 N | 7.57                       | 236.58                                       | 7.38                                     | 0.69                                    | 0.46                                    |                                               |
| TH2       |               | 120.360653 E, 31.319236 N | 7.43                       | 231.54                                       | 6.88                                     | 0.58                                    | 0.46                                    |                                               |
| TH3       |               | 120.365975 E, 31.323250 N | 7.42                       | 260.29                                       | 8.80                                     | 0.75                                    | 0.48                                    |                                               |
| TH4       |               | 120.361801 E, 31.329070 N | 7.33                       | 201.38                                       | 8.60                                     | 0.72                                    | 0.44                                    |                                               |
| TH5       |               | 120.354774 E, 31.327810 N | 8.08                       | 215.78                                       | 4.34                                     | 0.46                                    | 0.52                                    |                                               |
| NH1       | 10-y          | 120.619401 E, 31.596576 N | 6.78                       | 361.80                                       | 15.07                                    | 0.98                                    | 0.48                                    |                                               |
| NH2       |               | 120.625366 E, 31.590627 N | 6.78                       | 180.28                                       | 7.93                                     | 0.87                                    | 0.41                                    |                                               |
| NH3       |               | 120.632683 E, 31.587259 N | 6.13                       | 276.81                                       | 11.59                                    | 0.93                                    | 0.39                                    |                                               |

**Table S2.** Microbial assemblage diversity index (mean  $\pm$  SE, n = 56) for the 40y, 30y, 20y and 10y of restored wetlands. Different lowercase letters present significant differences ( $p < 0.05$ ) among different sampling areas.

| <b>Period</b> | <b>Recovery Time</b> | <b>40-y</b>            | <b>30-y</b>            | <b>20-y</b>            | <b>10-y</b>            |
|---------------|----------------------|------------------------|------------------------|------------------------|------------------------|
| Level season  | bacteria             | 260.807 $\pm$ 61.198ab | 269.452 $\pm$ 21.065a  | 244.929 $\pm$ 41.710ac | 221.277 $\pm$ 65.038bc |
|               | fungi                | 240.062 $\pm$ 44.54bc  | 281.201 $\pm$ 31.464a  | 217.028 $\pm$ 51.201c  | 273.748 $\pm$ 47.156ab |
| Wet season    | bacteria             | 158.297 $\pm$ 51.057a  | 188.088 $\pm$ 68.382a  | 119.729 $\pm$ 41.856b  | 143.328 $\pm$ 72.395a  |
|               | fungi                | 268.790 $\pm$ 47.228b  | 351.854 $\pm$ 31.995a  | 188.455 $\pm$ 39.527c  | 254.734 $\pm$ 40.390b  |
| Dry season    | bacteria             | 288.847 $\pm$ 47.133a  | 261.167 $\pm$ 20.240ab | 233.718 $\pm$ 52.687b  | 233.628 $\pm$ 42.613b  |
|               | fungi                | 209.857 $\pm$ 54.610a  | 230.457 $\pm$ 50.972a  | 195.982 $\pm$ 49.603a  | 222.270 $\pm$ 59.280a  |

**Table S3.** The community stability index in the different recovery periods.

|              | <b>40y</b>   | <b>30y</b>  | <b>20y</b>  | <b>10y</b>  | <b>Sig.</b> |
|--------------|--------------|-------------|-------------|-------------|-------------|
| Level season | 0.729 (5313) | 0.711(5830) | 0.718(4636) | 0.811(5495) |             |
| Wet season   | 0.756 (3869) | 0.791(5486) | 0.749(3097) | 0.769(3449) |             |
| Dry season   | 0.696 (5611) | 0.759(5229) | 0.763(4349) | 0.733(4839) |             |
| Whole year   | 0.605(6283)  | 0.616(5939) | 0.613(5694) | 0.627(6860) | 0.016*      |
| Sig.         | 0.137        | 0.112       | 0.112       | 0.001**     |             |

Note: (the number of OTU), \*indicates significant differences at  $p < 0.05$ ; \*\*indicates significant differences at  $p < 0.01$ .

**Table S4.** ANOSIM between the groups, the R values between two groups with (a) bacterial and (b) fungal assemblages.

| (a) |         |         |         |     |
|-----|---------|---------|---------|-----|
|     | 40y     | 30y     | 20y     | 10y |
| 40y | 1       |         |         |     |
| 30y | 0.084** | 1       |         |     |
| 20y | 0.130** | 0.109** | 1       |     |
| 10y | 0.122** | 0.195** | 0.108** | 1   |
| (b) |         |         |         |     |
|     | 40y     | 30y     | 20y     | 10y |
| 40y | 1       |         |         |     |
| 30y | 0.151** | 1       |         |     |
| 20y | 0.207** | 0.256** | 1       |     |
| 10y | 0.163** | 0.175** | 0.279** | 1   |

Note: \*\*indicates significant differences at  $p < 0.01$ .

**Table S5.** The statistics of bacterial and fungal indicators

|          | Periods | Level Season |                |                | Wet Season |                |                | Dry Season |                |                | Whole Year |                |                |
|----------|---------|--------------|----------------|----------------|------------|----------------|----------------|------------|----------------|----------------|------------|----------------|----------------|
|          |         | Total        | Unique species | Proportion (%) | Total      | Unique species | Proportion (%) | Total      | Unique species | Proportion (%) | Total      | Unique species | Proportion (%) |
| Bacteria | 40y     | 668          | 338            | 50.59          | 277        | 105            | 37.90          | 1147       | 564            | 49.17          | 1839       | 714            | 38.83          |
|          | 30y     | 906          | 494            | 54.52          | 805        | 604            | 75.03          | 901        | 378            | 41.95          | 2319       | 1154           | 49.76          |
|          | 20y     | 675          | 383            | 56.74          | 535        | 467            | 87.28          | 388        | 255            | 75.44          | 1557       | 1058           | 67.95          |
|          | 10y     | 486          | 352            | 72.42          | 226        | 127            | 56.19          | 530        | 401            | 75.66          | 1104       | 697            | 63.13          |
| Fungi    | 40y     | 59           | 55             | 93.22          | 116        | 111            | 95.68          | 46         | 45             | 97.82          | 233        | 198            | 84.97          |
|          | 30y     | 86           | 79             | 91.86          | 185        | 177            | 95.67          | 51         | 50             | 98.03          | 448        | 389            | 86.83          |
|          | 20y     | 31           | 29             | 93.54          | 40         | 40             | 100            | 28         | 28             | 100            | 163        | 158            | 96.93          |
|          | 10y     | 112          | 103            | 91.96          | 87         | 80             | 91.95          | 59         | 59             | 100            | 324        | 289            | 89.19          |

**Table S6.** Numbers of bacteria and fungi in the different modules.

| <b>Module</b>    | <b>M1</b> | <b>M2</b> | <b>M6</b> | <b>M8</b> | <b>total</b> |
|------------------|-----------|-----------|-----------|-----------|--------------|
| Total            | 194       | 342       | 90        | 69        | 695          |
| Bacteria         | 104       | 342       | 84        | 63        | 593          |
| Fungi            | 90        | 0         | 6         | 9         | 105          |
| Core taxa        | 58        | 286       | 35        | 38        | 1134         |
| Keystone species | 0         | 22        | 0         | 0         | 0            |
| Proportion (%)   | 29.89     | 83.63     | 38.89     | 55.07     |              |

**Table S7.** Taxonomy of keystone species in the reed rhizosphere microbiome

| Num | OTU_num   | Kindom   | Phylum                 | Class                             | Order                             | Family                            | Genus                             |
|-----|-----------|----------|------------------------|-----------------------------------|-----------------------------------|-----------------------------------|-----------------------------------|
| 1   | OTU_12    | Bacteria | <i>Proteobacteria</i>  | <i>Deltaproteobacteria</i>        | <i>Desulfarcuiales</i>            | <i>Desulfarculaceae</i>           | <i>Desulfatiglans</i>             |
| 2   | OTU_19    | Archaea  | <i>Euryarchaeota</i>   | <i>Methanomicrobia</i>            | <i>Methanosarcinales</i>          | <i>Methanosaetaceae</i>           | <i>Methanosaeta</i>               |
| 3   | OTU_20    | Bacteria | <i>Nitrospirae</i>     |                                   |                                   |                                   |                                   |
| 4   | OTU_62    | Bacteria | <i>Proteobacteria</i>  | <i>Deltaproteobacteria</i>        | <i>Syntrophobacteriales</i>       | <i>Syntrophaceae</i>              |                                   |
| 5   | OTU_69    | Bacteria | <i>Proteobacteria</i>  | <i>Deltaproteobacteria</i>        | <i>Syntrophobacteriales</i>       | <i>Syntrophaceae</i>              |                                   |
| 6   | OTU_93    | Bacteria | <i>Proteobacteria</i>  | <i>Deltaproteobacteria</i>        | <i>Syntrophobacteriales</i>       | <i>Syntrophobacteraceae</i>       |                                   |
| 7   | OTU_115   | Bacteria | <i>Proteobacteria</i>  | <i>Deltaproteobacteria</i>        | <i>Syntrophobacteriales</i>       | <i>Syntrophaceae</i>              |                                   |
| 8   | OTU_132   | Bacteria | <i>Acidobacteria</i>   | <i>unidentified_Acidobacteria</i> | <i>unidentified_Acidobacteria</i> | <i>unidentified_Acidobacteria</i> | <i>unidentified_Acidobacteria</i> |
| 9   | OTU_348   | Bacteria | <i>Proteobacteria</i>  | <i>Deltaproteobacteria</i>        |                                   |                                   |                                   |
| 10  | OTU_383   | Bacteria | <i>Proteobacteria</i>  | <i>Deltaproteobacteria</i>        |                                   |                                   |                                   |
| 11  | OTU_488   | Bacteria | <i>Chloroflexi</i>     | <i>Dehalococcoidia</i>            |                                   |                                   |                                   |
| 12  | OTU_499   | Bacteria | <i>Acidobacteria</i>   |                                   |                                   |                                   |                                   |
| 13  | OTU_815   | Bacteria | <i>Proteobacteria</i>  | <i>Deltaproteobacteria</i>        |                                   |                                   |                                   |
| 14  | OTU_927   | Bacteria | <i>Spirochaetes</i>    | <i>Spirochaetia</i>               | <i>Spirochaetales</i>             | <i>Spirochaetaceae</i>            |                                   |
| 15  | OTU_1048  | Bacteria | <i>Bacteroidetes</i>   | <i>Bacteroidia</i>                | <i>Bacteroidales</i>              |                                   |                                   |
| 16  | OTU_2983  | Bacteria | <i>Proteobacteria</i>  | <i>Deltaproteobacteria</i>        | <i>Desulfobacterales</i>          | <i>Desulfobacteraceae</i>         |                                   |
| 17  | OTU_3793  | Bacteria | <i>Nitrospirae</i>     |                                   |                                   |                                   |                                   |
| 18  | OTU_11129 | Bacteria | <i>Latescibacteria</i> |                                   |                                   |                                   |                                   |
| 19  | OTU_13890 | Bacteria | <i>Acidobacteria</i>   |                                   |                                   |                                   |                                   |
| 20  | OTU_17435 | Bacteria | <i>Nitrospirae</i>     |                                   |                                   |                                   |                                   |
| 21  | OTU_20759 | Bacteria | <i>Acidobacteria</i>   | <i>Acidobacteriia</i>             | <i>Solibacterales</i>             |                                   |                                   |
| 22  | OTU_22938 | Bacteria | <i>Proteobacteria</i>  | <i>Deltaproteobacteria</i>        | <i>Desulfarcuiales</i>            | <i>Desulfarculaceae</i>           | <i>Desulfatiglans</i>             |



**Table S8.** The categories of functional profiles

| Number | Code          | Name                                                                                                                           | Functional Feature                                                                                                             | Functional Groups                                                                                      |
|--------|---------------|--------------------------------------------------------------------------------------------------------------------------------|--------------------------------------------------------------------------------------------------------------------------------|--------------------------------------------------------------------------------------------------------|
| 1      | COG0438, 0463 | Glycosyltransferase involved in cell wall biosynthesis                                                                         | Carbohydrate transport and metabolism                                                                                          | <i>Proteobacteria, Gammaproteobacteria, Enterobacterales, Pantoea. etc.</i>                            |
| 2      | COG0451       | Nucleoside-diphosphate-sugar epimerase                                                                                         | Cell motility, Signal transduction mechanisms                                                                                  | <i>Actinobacteria, Rubrobacterales, Rubrobacteraceae, Rubrobacter. etc.</i>                            |
| 3      | COG0583       | DNA-binding transcriptional regulator, LysR family                                                                             | Cell                                                                                                                           | <i>Firmicutes, Clostridia, Clostridiales. etc.</i>                                                     |
| 4      | COG0596       | Pimeloyl-ACP methyl ester carboxylesterase                                                                                     | wall/membrane/envelope biogenesis                                                                                              | <i>Actinobacteria, Streptomycetales, Streptomycetaceae, Streptomyces. etc.</i>                         |
| 5      | COG0642       | Signal transduction histidine kinase                                                                                           | Cell wall/membrane/envelope biogenesis, Defense mechanisms                                                                     | <i>Cyanobacteria, Oscillatoriales, Coleofasciculaceae. etc.</i>                                        |
| 6      | COG0745       | DNA-binding response regulator, OmpR family, contains REC and winged-helix (wHTH) domain                                       | Cell wall/membrane/envelope biogenesis                                                                                         | <i>Proteobacteria, Gammaproteobacteria. etc.</i>                                                       |
| 7      | COG1028       | NAD(P)-dependent dehydrogenase, short-chain alcohol dehydrogenase family                                                       | Inorganic ion transport and metabolism                                                                                         | <i>Actinobacteria, Corynebacteriales, Mycobacteriaceae. etc.</i>                                       |
| 8      | COG1032       | Radical SAM superfamily enzyme YgiQ, UPF0313 family                                                                            | Lipid transport and metabolism                                                                                                 | <i>Firmicutes, Clostridia. etc.</i>                                                                    |
| 9      | COG1309       | DNA-binding transcriptional regulator, AcrR family                                                                             | Lipid transport and metabolism, Secondary metabolites biosynthesis, transport and catabolism, General function prediction only | <i>Actinobacteria, Mycobacteriaceae. etc.</i>                                                          |
| 10     | COG1538       | Outer membrane protein TolC                                                                                                    |                                                                                                                                | <i>Proteobacteria, Gammaproteobacteria, Vibrionales, Vibrionaceae. etc.</i>                            |
| 11     | COG1595       | DNA-directed RNA polymerase specialized sigma subunit, sigma24 family                                                          | Signal transduction mechanisms                                                                                                 | <i>Actinobacteria, Streptosporangiales, Streptosporangiaceae. etc.</i>                                 |
| 12     | COG0515       | Serine/threonine protein kinase                                                                                                |                                                                                                                                | <i>Firmicutes; Bacilli; Lactobacillales; Streptococcaceae; Streptococcus</i>                           |
| 13     | COG1629       | Outer membrane receptor proteins, mostly Fe transport                                                                          |                                                                                                                                | <i>Bacteroidetes, Flavobacteriales, Flavobacteriaceae, Flavobacterium. etc.</i>                        |
| 14     | COG2197       | DNA-binding response regulator, NarL/FixJ family, contains REC and HTH domains                                                 | Signal transduction mechanisms, Transcription                                                                                  | <i>Actinobacteria; Pseudonocardiales; Pseudonocardaceae; Kibdelosporangium. etc.</i>                   |
| 15     | COG2204       | DNA-binding transcriptional response regulator, NtrC family, contains REC, AAA-type ATPase, and a Fis-type DNA-binding domains | Transcription                                                                                                                  | <i>Proteobacteria, Alphaproteobacteria, Rhodobacterales, Rhodobacteraceae. etc.</i>                    |
| 16     | COG2814       | Predicted arabinose efflux permease, MFS family                                                                                |                                                                                                                                | <i>Firmicutes, Clostridia, Clostridiales, Clostridiales. etc.</i>                                      |
| 17     | COG1506       | Dipeptidyl aminopeptidase/acylaminoacyl peptidase                                                                              | Amino acid transport and metabolism                                                                                            | <i>Actinobacteria; Rubrobacteria; Rubrobacterales; Rubrobacteraceae; Rubrobacter. etc.</i>             |
| 18     | COG0747       | ABC-type transport system, periplasmic component                                                                               |                                                                                                                                | <i>Spirochaetes; Leptospirales; Leptospiraceae; Leptospira. etc.</i>                                   |
| 19     | COG1132       | ABC-type multidrug transport system, ATPase and permease component                                                             | Defense mechanisms                                                                                                             | <i>Firmicutes; Bacilli; Lactobacillales; Lactobacillaceae; Paucilactobacillus. etc.</i>                |
| 20     | COG0535       | Radical SAM superfamily enzyme, MoaA/NifB/PqqE/SkfB family                                                                     | General function prediction only                                                                                               | <i>Firmicutes; Clostridia; Thermoanaerobacterales; Thermoanaerobacteraceae; Thermanaeromonas. etc.</i> |
| 21     | COG4636       | Endonuclease, Uma2 family (restriction endonuclease fold)                                                                      |                                                                                                                                | <i>Cyanobacteria; Nostocales; Nostocaceae; Nostoc. etc.</i>                                            |

|    |         |                                                                                  |                                   |                                                                                                                                                                                                                                                                                                                                                                                                                                                                                                                                                 |
|----|---------|----------------------------------------------------------------------------------|-----------------------------------|-------------------------------------------------------------------------------------------------------------------------------------------------------------------------------------------------------------------------------------------------------------------------------------------------------------------------------------------------------------------------------------------------------------------------------------------------------------------------------------------------------------------------------------------------|
| 22 | COG0491 | Glyoxylase or a related metal-dependent hydrolase, beta-lactamase superfamily II |                                   | <i>Proteobacteria; Gammaproteobacteria; Enterobacterales; Morganellaceae; Photorhabdus. etc.</i>                                                                                                                                                                                                                                                                                                                                                                                                                                                |
| 23 | COG0845 | Multidrug efflux pump subunit AcrA (membrane-fusion protein)                     |                                   | <i>Spirochaetes, Leptospiraceae, Leptospira. etc.</i>                                                                                                                                                                                                                                                                                                                                                                                                                                                                                           |
| 24 | COG1024 | Enoyl-CoA hydratase/carnithine racemase                                          | -                                 | <i>Actinobacteria; Corynebacteriales; Gordoniaceae; Gordonia. etc.</i>                                                                                                                                                                                                                                                                                                                                                                                                                                                                          |
| 25 | COG1357 | Uncharacterized protein Yjbl, contains pentapeptide repeats                      | Function unknown                  | <i>Proteobacteria; Gammaproteobacteria; Candidatus Kentron; unclassified Candidatus Kentron. etc.</i>                                                                                                                                                                                                                                                                                                                                                                                                                                           |
| 26 | PP      | Plant pathogen                                                                   | Pathotroph                        | <i>Immersidiscosia eucalypti; Gibellulopsis nigrescens; Gibberella acuminata; Cercospora; Ophiostoma bicolor; Lasiodiplodia iraniensis; Phlyctochytrium lagenaria.</i>                                                                                                                                                                                                                                                                                                                                                                          |
| 27 | FP      | Fungal parasite                                                                  |                                   | <i>Syncephalis.</i>                                                                                                                                                                                                                                                                                                                                                                                                                                                                                                                             |
| 28 | PPSS    | Plant pathogen soil saprotroph                                                   |                                   | <i>Fusarium; Fusarium oxysporum.</i>                                                                                                                                                                                                                                                                                                                                                                                                                                                                                                            |
| 29 | BPLS    | Bryophyte parasite leaf saprotroph                                               | Pathotroph saprotroph             | <i>Pluteus.</i>                                                                                                                                                                                                                                                                                                                                                                                                                                                                                                                                 |
| 30 | AEUS    | Animal endosymbiont undefined saprotroph                                         |                                   | <i>Rhodotorula; Rhodotorula mucilaginosa.</i>                                                                                                                                                                                                                                                                                                                                                                                                                                                                                                   |
| 31 | FPUS    | Fungal parasite undefined saprotroph                                             | Pathotroph-Saprotroph-Symbiotroph | <i>Bulleribasidium wuzhishanense.</i>                                                                                                                                                                                                                                                                                                                                                                                                                                                                                                           |
| 32 | APEP    | Animal pathogen endophyte plant pathogen wood saprotroph                         |                                   | <i>Alternaria.</i>                                                                                                                                                                                                                                                                                                                                                                                                                                                                                                                              |
| 33 | OMPP    | Orchid mycorrhizal plant pathogen wood saprotroph                                | Saprotroph-Pathotroph-Symbiotroph | <i>Rhizoctonia.</i>                                                                                                                                                                                                                                                                                                                                                                                                                                                                                                                             |
| 34 | EPP     | Endophyte plant pathogen                                                         | Pathotroph symbiotroph            | <i>Colletotrichum; Cladosporium cladosporioides; Colletotrichum coccodes; Colletotrichum destructivum.</i>                                                                                                                                                                                                                                                                                                                                                                                                                                      |
| 35 | APCE    | Animal pathogen clavicipitaceous endophyte fungal parasite                       |                                   | <i>Cordyceps.</i>                                                                                                                                                                                                                                                                                                                                                                                                                                                                                                                               |
| 36 | DSUS    | Dung saprotroph undefined saprotroph wood saprotroph                             |                                   | <i>Chaetomium.</i>                                                                                                                                                                                                                                                                                                                                                                                                                                                                                                                              |
| 37 | US      | Undefined saprotroph                                                             | Saprotroph                        | <i>Hypocreales; Pseudeurotium; Immersiella caudata; Pseudoprobosciscpora; Dactylonectria macrodidyma; Platystomum crataegi; Pseudeurotium; Nectriaceae; Exophiala; Mucor; Lopadostoma meridionale; Melanopsamma xylophila; Scolecobasidium humicola; Dactylonectria macrodidyma; Nigrospora; Nectriaceae; Starmera; Diutina mesorugosa; Eurotiales; Hypocreales; Orbilia; Acrocalymma; Idriella lunata; Uwebraunia dekkeri; Candida. Pseudoprobosciscpora; Psathyrella typhae; Immersiella caudata; Sphaerellopsis filum; Morchella eximia.</i> |
| 38 | WS      | Wood saprotroph                                                                  |                                   | <i>Crinipellis rhizomaticola.</i>                                                                                                                                                                                                                                                                                                                                                                                                                                                                                                               |
| 39 | LS      | Leaf saprotroph                                                                  |                                   | <i>Ascobolaceae.</i>                                                                                                                                                                                                                                                                                                                                                                                                                                                                                                                            |
| 40 | DSSS    | Dung saprotroph soil saprotroph wood saprotroph                                  |                                   | <i>Rhinochlaidiella.</i>                                                                                                                                                                                                                                                                                                                                                                                                                                                                                                                        |
| 41 | USWS    | Undefined saprotroph wood saprotroph                                             |                                   | <i>Geastrum lageniforme.</i>                                                                                                                                                                                                                                                                                                                                                                                                                                                                                                                    |
| 42 | SS      | Soil saprotroph                                                                  |                                   | <i>Cercophora coprophila.</i>                                                                                                                                                                                                                                                                                                                                                                                                                                                                                                                   |
| 43 | DS      | Dung saprotroph                                                                  |                                   | <i>Entoloma.</i>                                                                                                                                                                                                                                                                                                                                                                                                                                                                                                                                |
| 44 | EUS     | Ectomycorrhizal undefined saprotroph                                             | Saprotroph symbiotroph            | <i>Glomeromycota; Archaeosporaceae; Glomeraceae; Acaulosporaceae; Diversisporaceae; Acaulospora mellea; Paraglomeraleae; Diversispora.</i>                                                                                                                                                                                                                                                                                                                                                                                                      |
| 45 | AM      | Arbuscular mycorrhizal                                                           | Symbiotroph                       | <i>Sticta; Trichosporon asahii; Acaulospora mellea.</i>                                                                                                                                                                                                                                                                                                                                                                                                                                                                                         |
| 46 | LC      | Lichenized                                                                       |                                   |                                                                                                                                                                                                                                                                                                                                                                                                                                                                                                                                                 |

|    |    |                 |            |                                                                                                                                                                                                                                                                                                                                                                                                                                                                                                                                                                                                                                                     |
|----|----|-----------------|------------|-----------------------------------------------------------------------------------------------------------------------------------------------------------------------------------------------------------------------------------------------------------------------------------------------------------------------------------------------------------------------------------------------------------------------------------------------------------------------------------------------------------------------------------------------------------------------------------------------------------------------------------------------------|
| 47 | EM | Ectomycorrhizal |            | <i>Astraeus; Ceratobasidium; Pachyphloeus; Mallocybe; Lactarius pomiolens; Otidea daliensis; Hebeloma hiemale; Lactarius pomiolens; Inocybe semifulva; Inocybe lacunarum; Hydnum vesterholtii. Ascomycota; GS01; Rozellomycota; Chytridiomycota; Rozellomycota; Sordariales; Pezizaceae; Sordariomycetes; Pleosporales; Thelephoraceae; Helotiales; Lasiosphaeriaceae; Dothideomycetes; Halosphaeriaceae; Dothideomycetes; Sebaciniales; Ceratobasidiaceae; Xylariales; Polyporaceae; Phomatodes; Plectosphaerellaceae; Leucosporidium intermedium; Pseudopithomyces maydicus; Vanrija humicola; Phialemoniopsis curvata; Gonapodya polymorpha.</i> |
| 48 | UA | Unassigned      | Unassigned |                                                                                                                                                                                                                                                                                                                                                                                                                                                                                                                                                                                                                                                     |

Note: functional profiles are depicted according to the NCBI database (<https://www.ncbi.nlm.nih.gov/>).

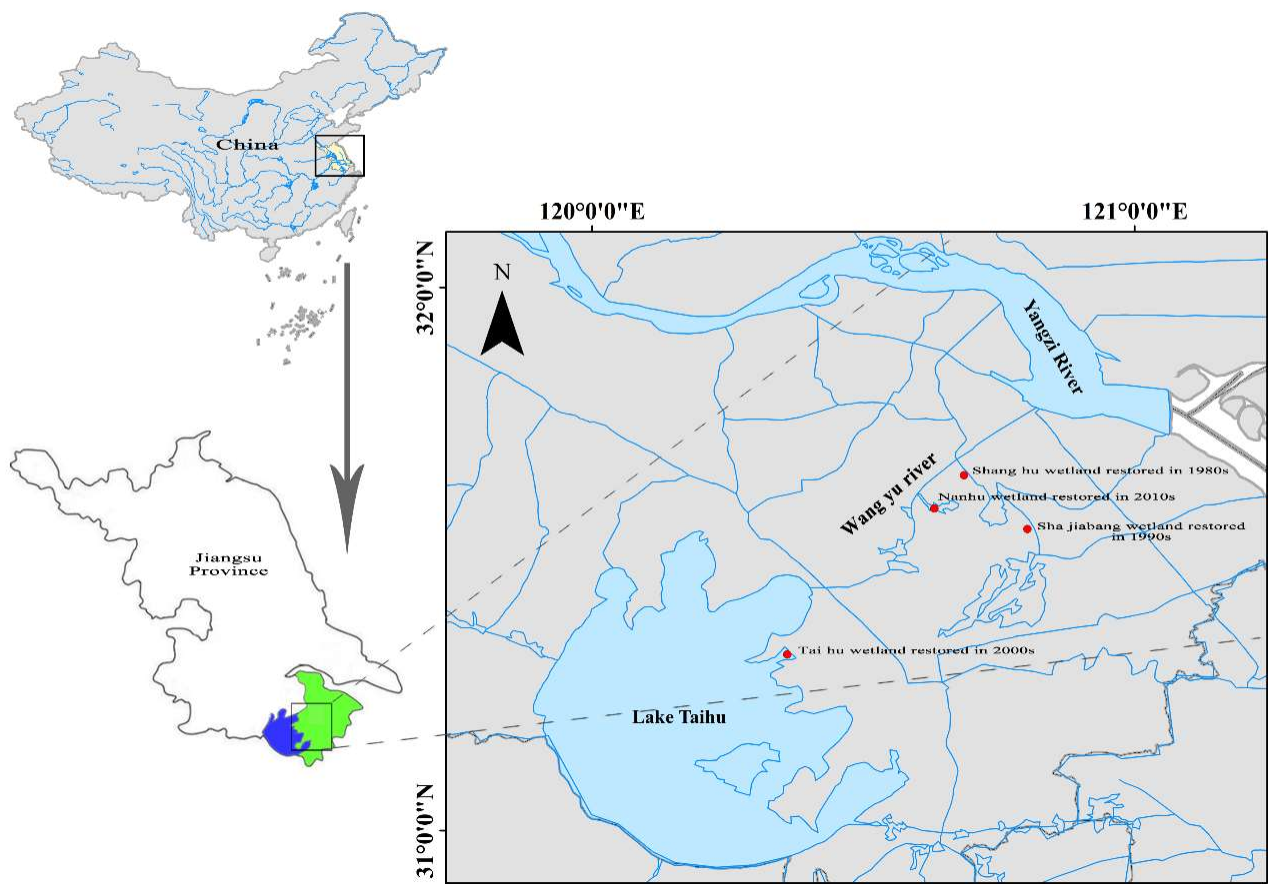

**Figure S1.** Location of the restored wetlands in the Lake Taihu Basin, East, China.

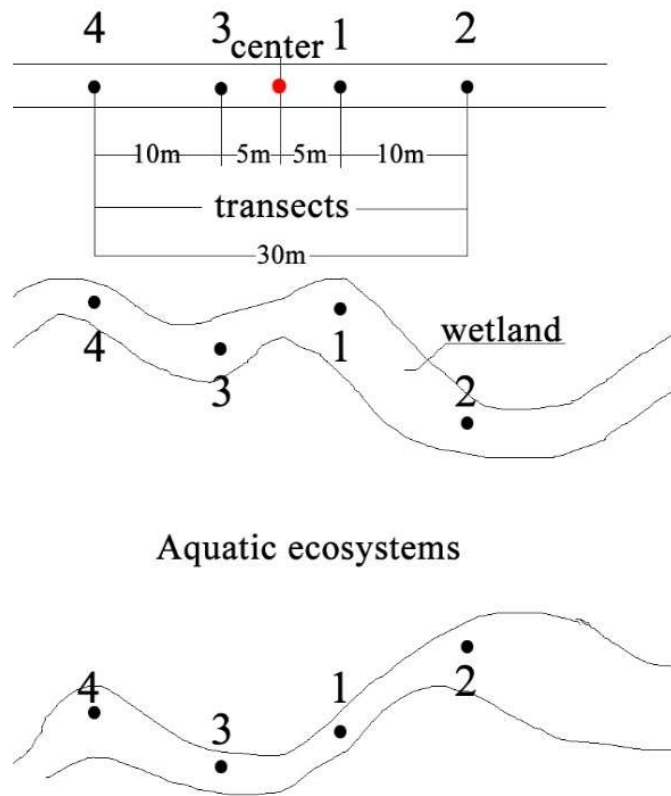

**Figure S2.** Schematic of the sample locations.

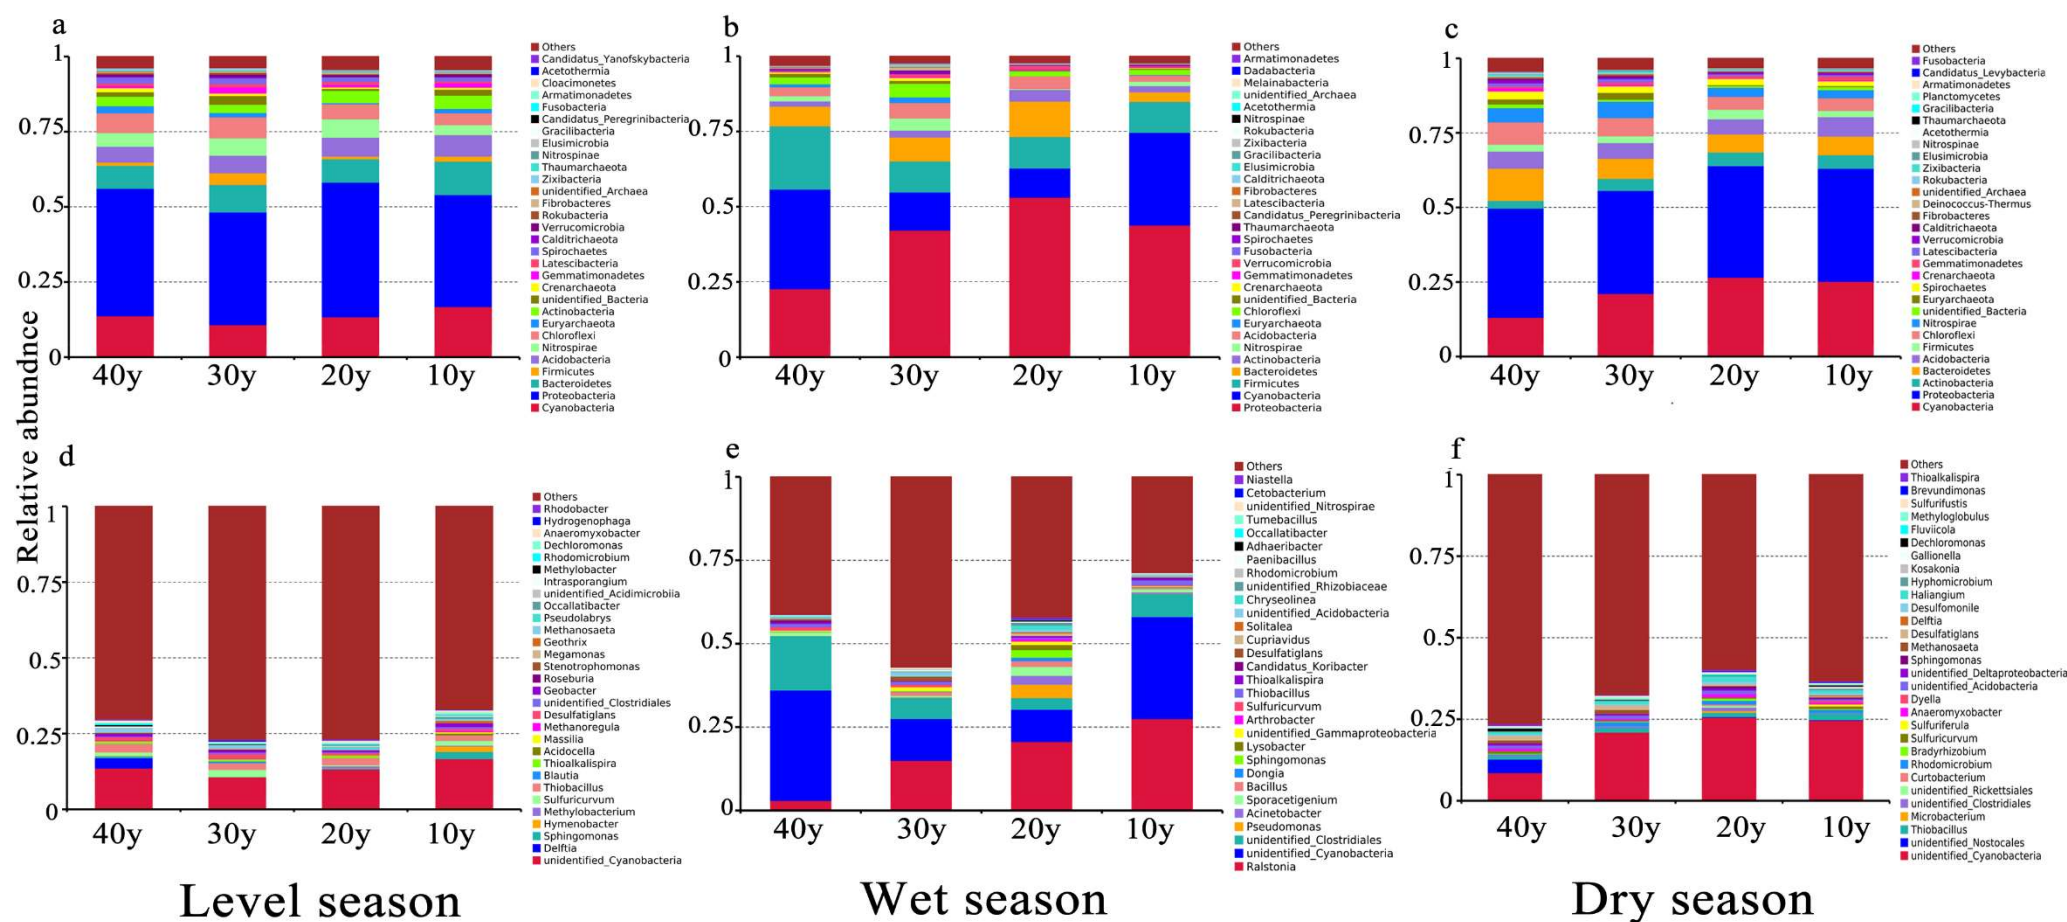

**Figure S3.** The relative abundance of bacterial communities at the (a-c) phylum and (d-f) genus- levels in the reed rhizosphere during the level, wet and dry seasons.

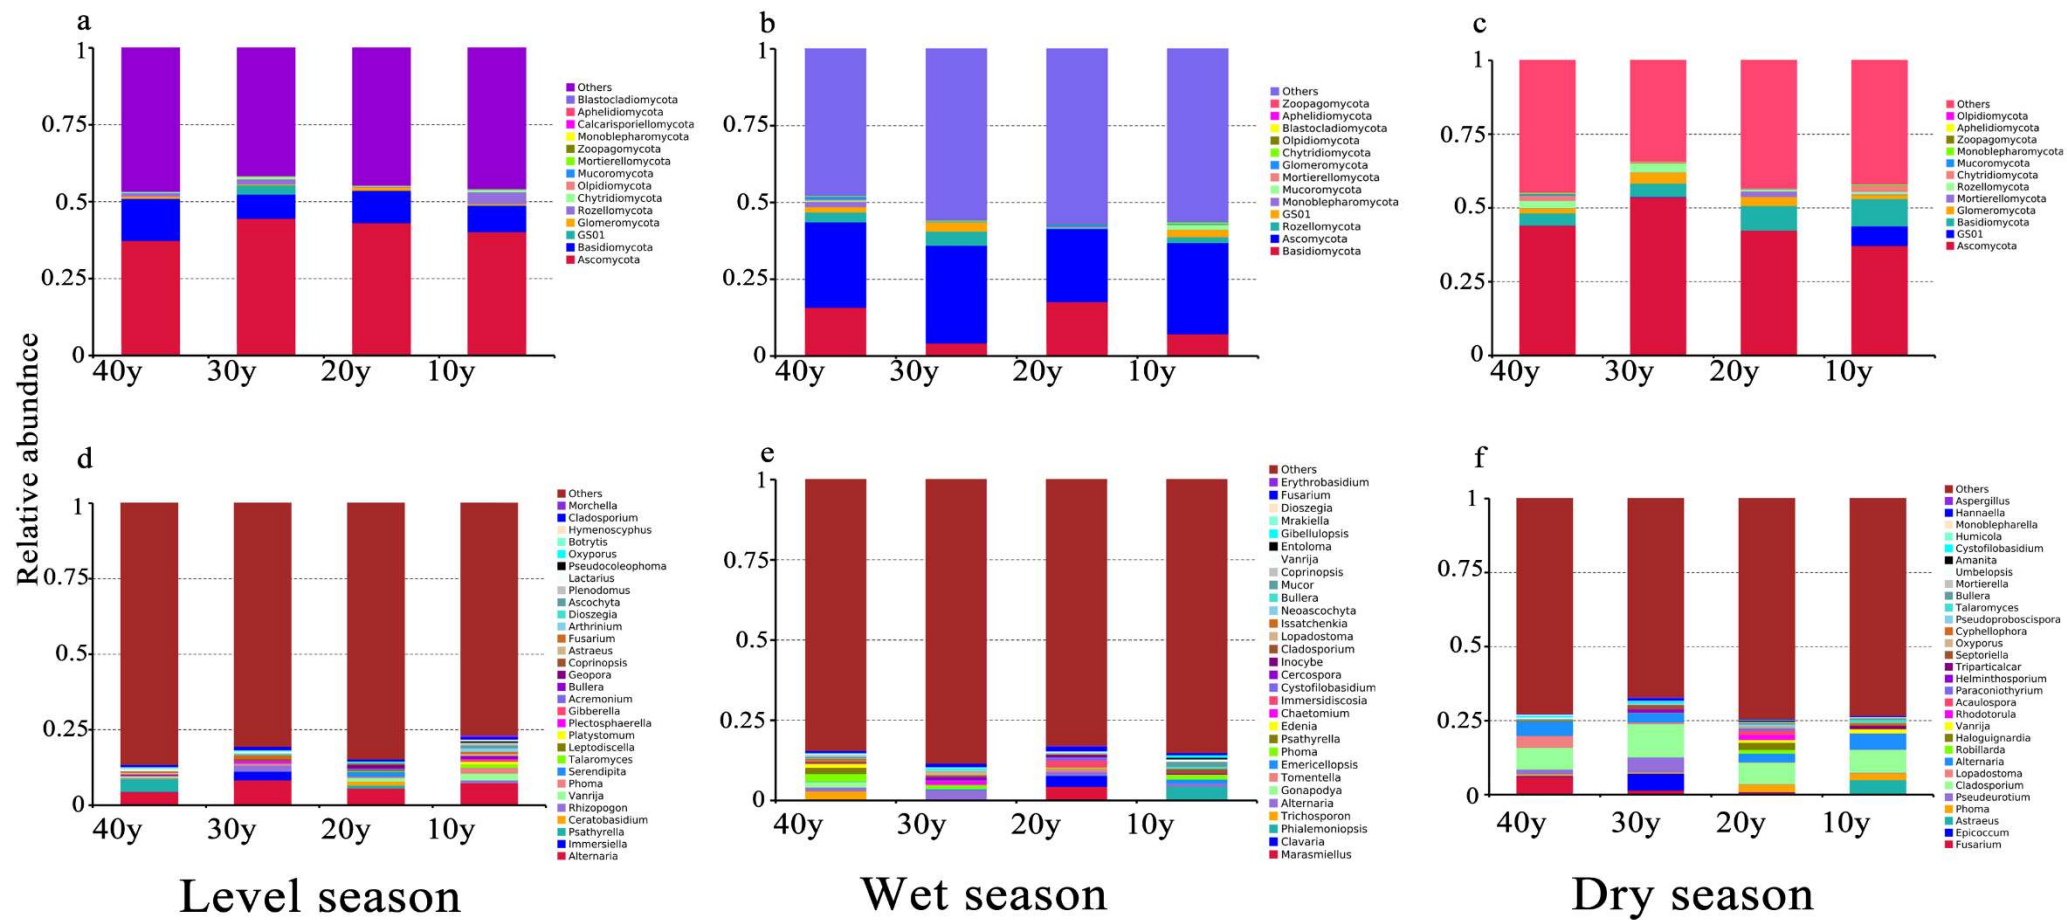

**Figure S4.** The relative abundance of fungal communities at the (a-c) phylum and (d-f) genus- levels in the reed rhizosphere in the level, wet and dry seasons.

## References

- Martin, M. (2011). Cutadapt removes adapter sequences from high-throughput sequencing reads. *Embnet Journal*, 17, 10-12. doi: [org/10.14806/ej.17.1.200](https://doi.org/10.14806/ej.17.1.200)
- Quast, C., Pruesse, E., Yilmaz, P., Gerken, J., Schweer, T., Yarza, P., Peplies, J., Glöckner, F.O. (2013). The SILVA ribosomal RNA gene database project: improved data processing and web-based tools. *Nucleic. Acids Research* 41, D590-D596. doi.org/10.1093/nar/gks1219
- Edgar, R.C., Haas, B.J., Clemente, J.C., Quince, C., Knight, R. (2011). UCHIME improves sensitivity and speed of chimera detection. *Bioinformatics*, 27, 2194-2200. doi.org/10.1093/bioinformatics/btr381
- Haas, B.J., Gever, D., Earl, A.M., Feldgarden, M., Ward, D.V., Giannoukos, G., Ciulla, D., Tabbaa, D., Highlander, S.K., Sodergren, E., Methe, B., Desantis, T.Z., the Human Microbiome Consortium, Petrosino, J.F., Knight, R., Birren, B.W. (2011). Chimeric 16S rRNA sequence formation and detection in Sanger and 454-pyrosequenced PCR amplicons. *Genome research*, 21, 494-504. doi: 10.1101/gr.112730.110.
- Edgar, R.C. (2013). UPARSE: highly accurate OTU sequences from microbial amplicon reads. *Nature methods*, 10, 996-998. doi: [org/10.1038/nmeth.2604](https://doi.org/10.1038/nmeth.2604)
- Edgar, R.C. (2004). MUSCLE: multiple sequence alignment with high accuracy and high throughput. *Nucleic acids research*, 32, 1792-1797. doi.org/10.1093/nar/gkh340
